# Supplementary material
Source: PubMed Central journal article supplement (PMC3849035)
Supplement: NIHMS484381-supplement-MCC_SI.pdf [file NIHMS484381-supplement-MCC_SI.pdf]

## Supporting Information

# Carbocyclic 5'-nor "reverse" fleximers. Design, synthesis, and preliminary biological activity

*Sarah C. Zimmermann,<sup>a</sup> Joshua M. Sadler,<sup>a</sup> Graciela Andrei,<sup>b</sup> Robert Snoeck,<sup>b</sup> Jan Balzarini,<sup>b</sup>  
Katherine L. Seley-Radtke<sup>\*a</sup>*

### Table of Contents

|                 |          |
|-----------------|----------|
| Figure S1.....  | Page S2  |
| Figure S2.....  | Page S3  |
| Figure S3.....  | Page S4  |
| Figure S4.....  | Page S5  |
| Figure S5.....  | Page S6  |
| Figure S6.....  | Page S7  |
| Figure S7.....  | Page S8  |
| Figure S8.....  | Page S9  |
| Figure S9.....  | Page S10 |
| Figure S10..... | Page S11 |
| Figure S11..... | Page S12 |

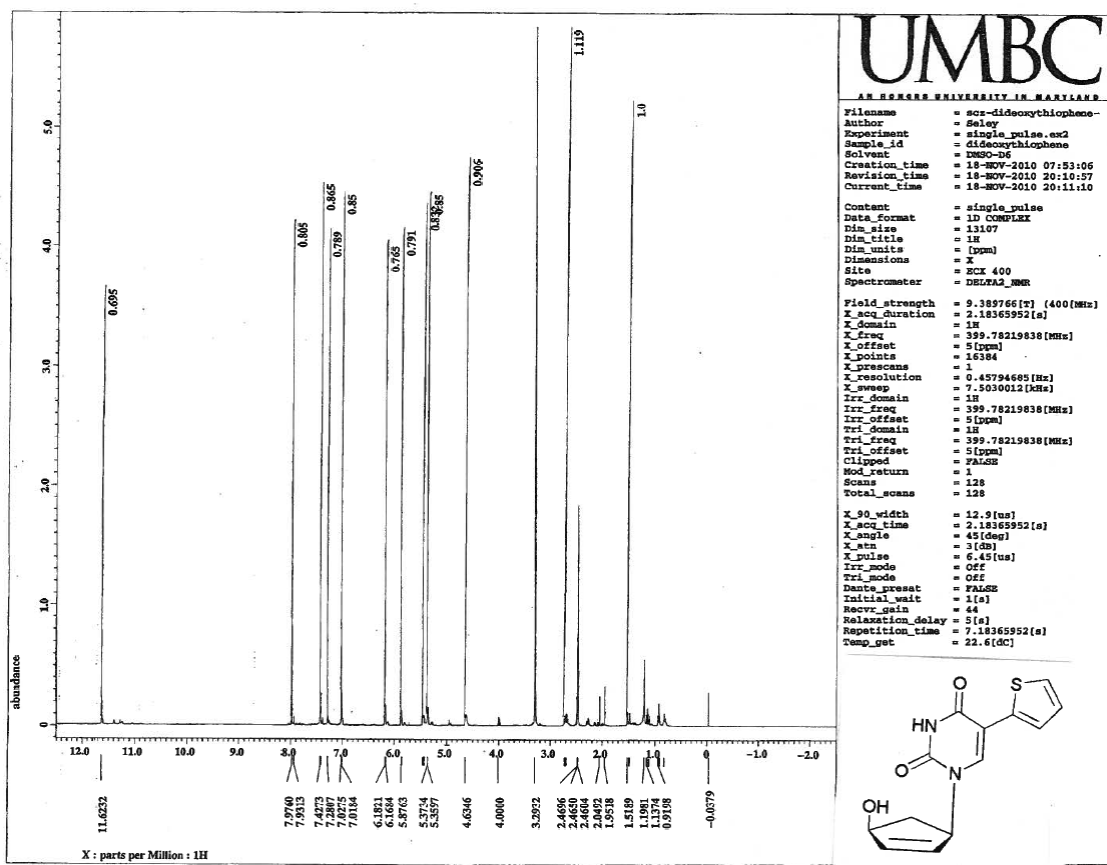

Figure S1.  $^1\text{H}$  NMR of 1a

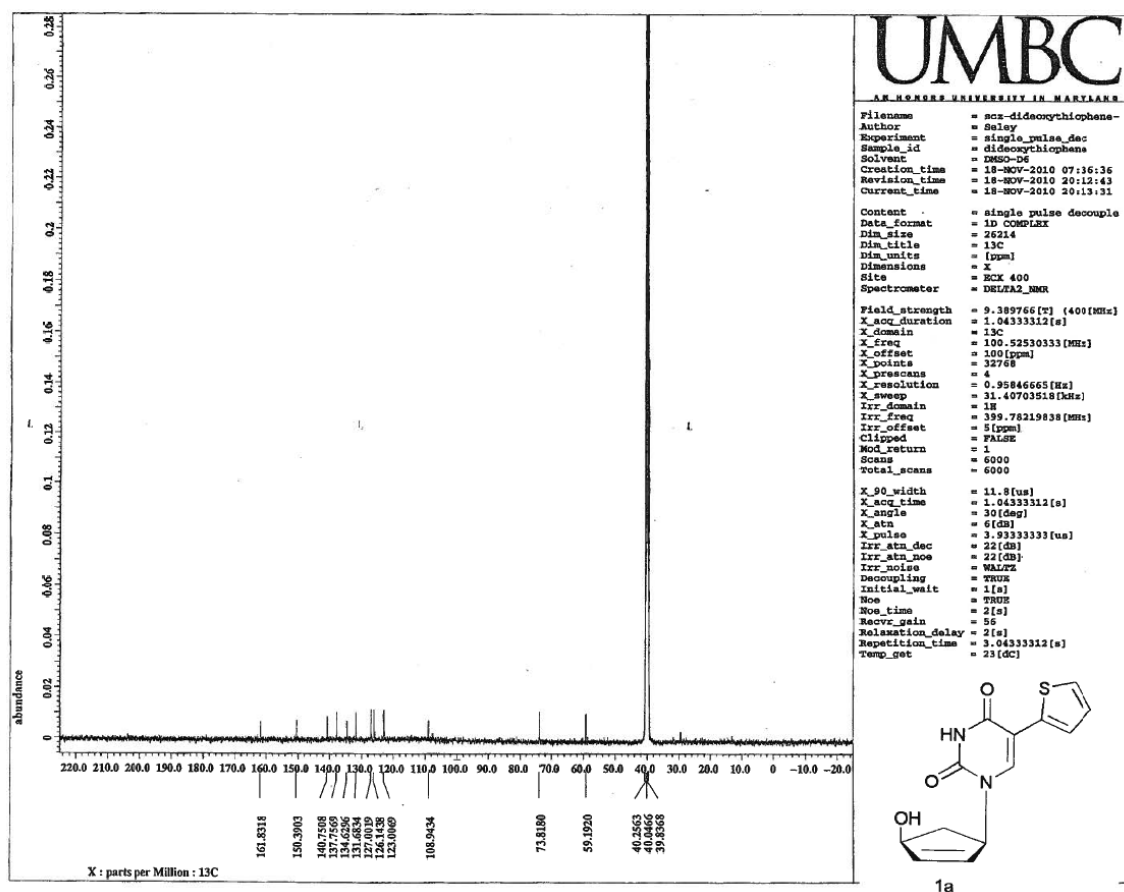

Figure S2. <sup>13</sup>C NMR of 1a

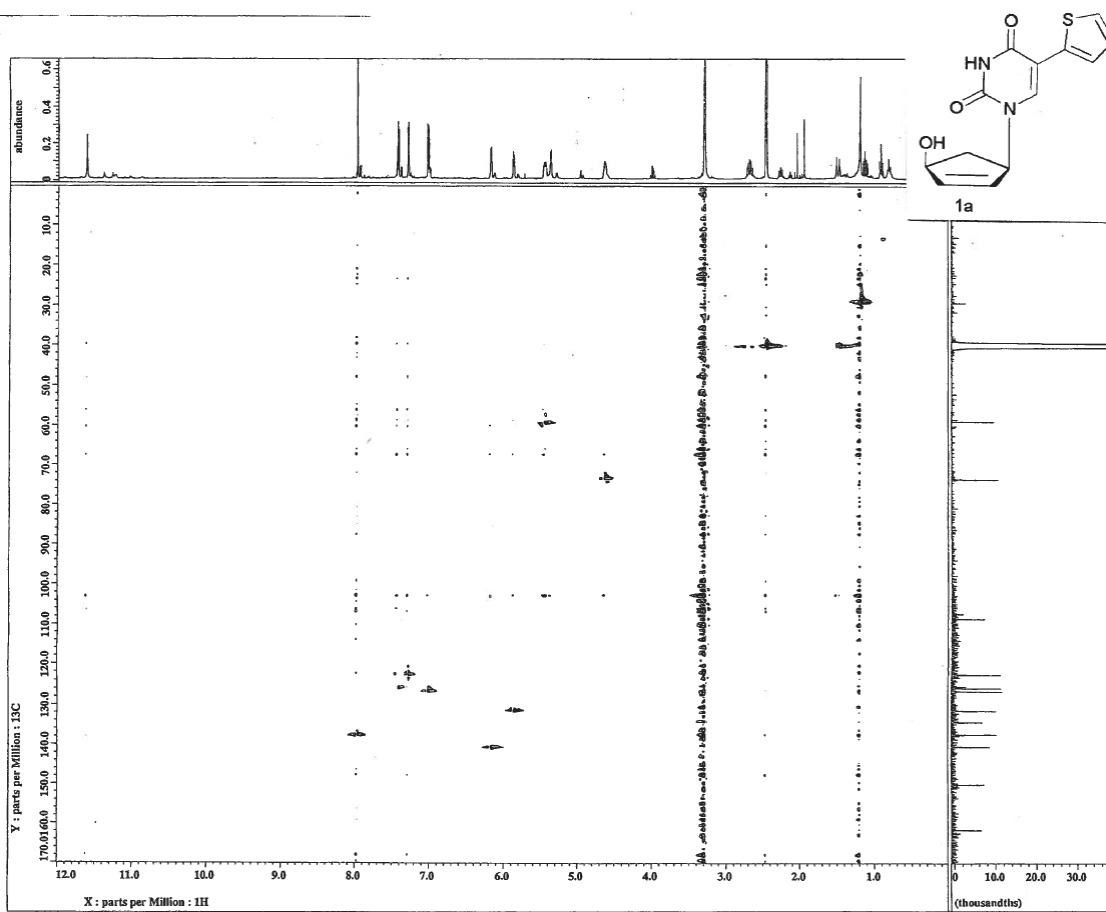

Figure S3. HMQC of 1a

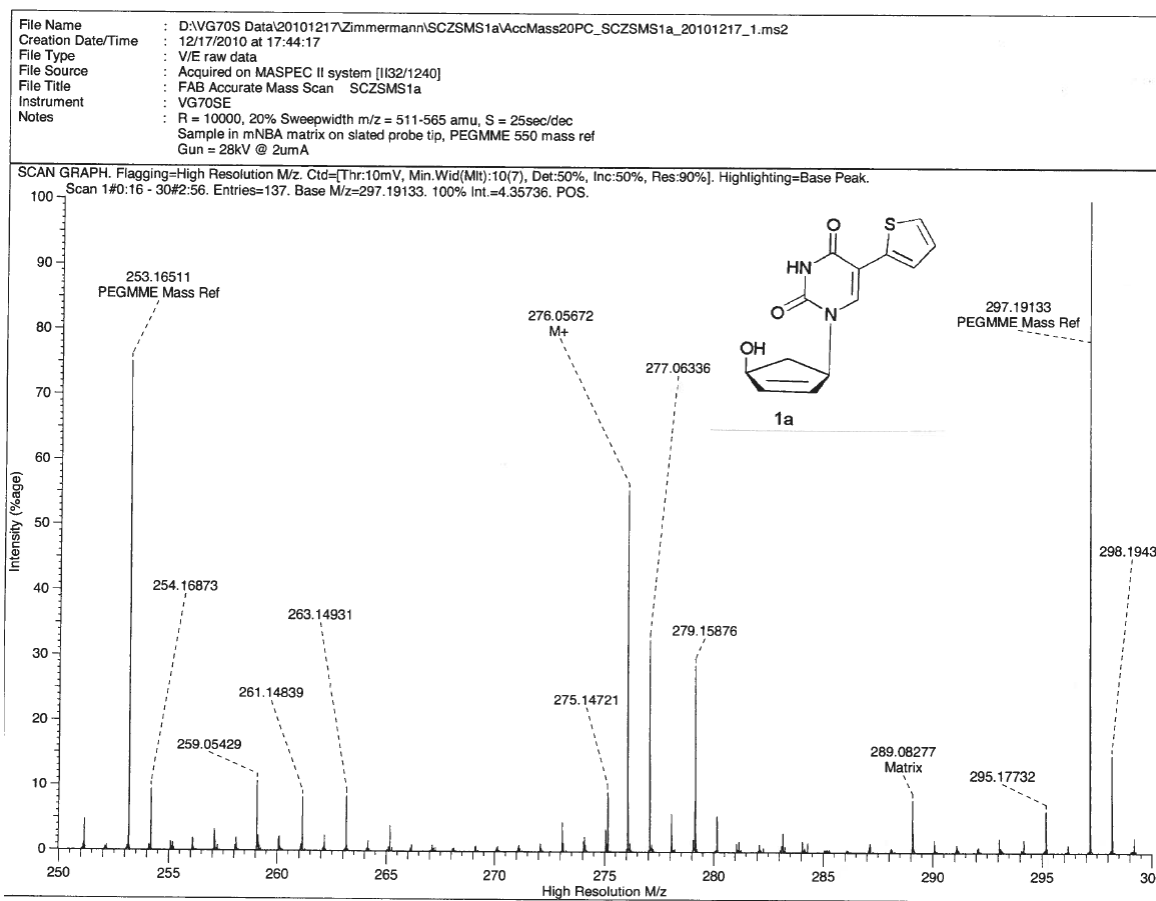

Figure S4. HRMS of 1a

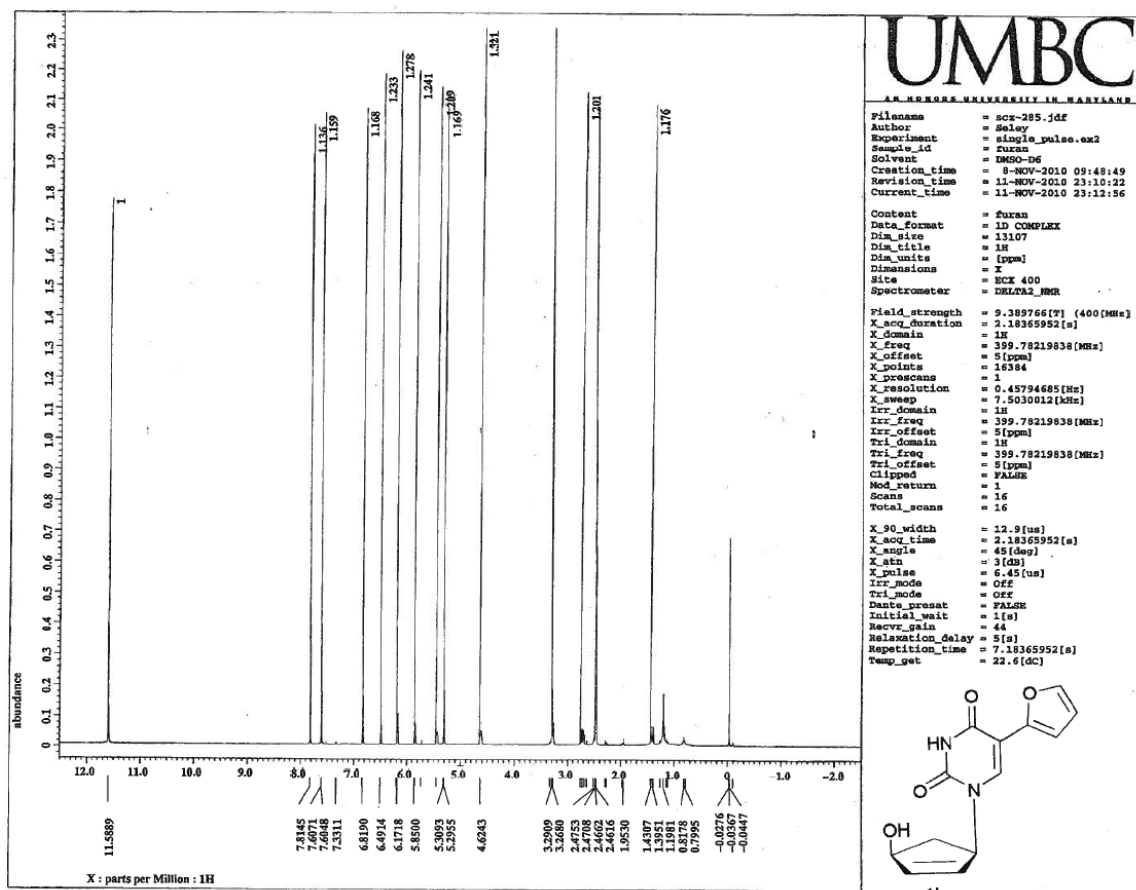

Figure S5. <sup>1</sup>H NMR of 1b

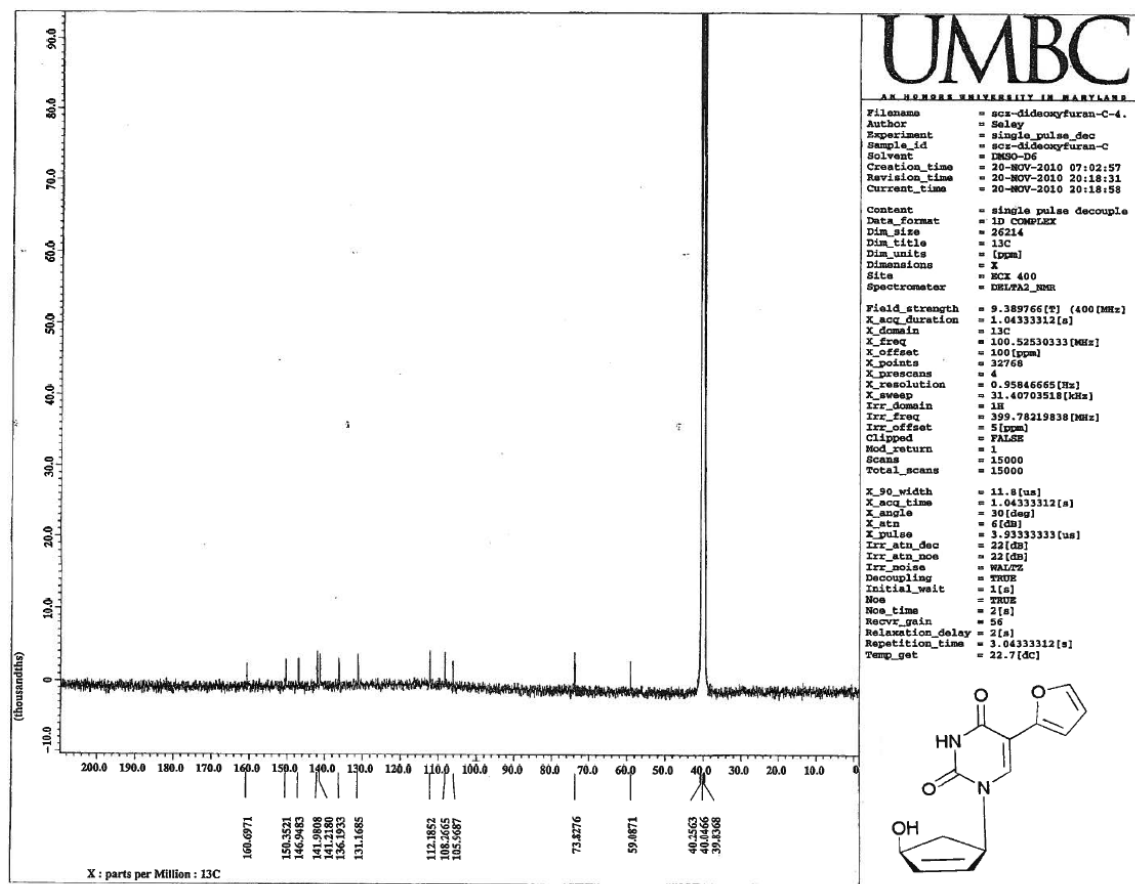

Figure S6.  $^{13}\text{C}$  NMR of 1b

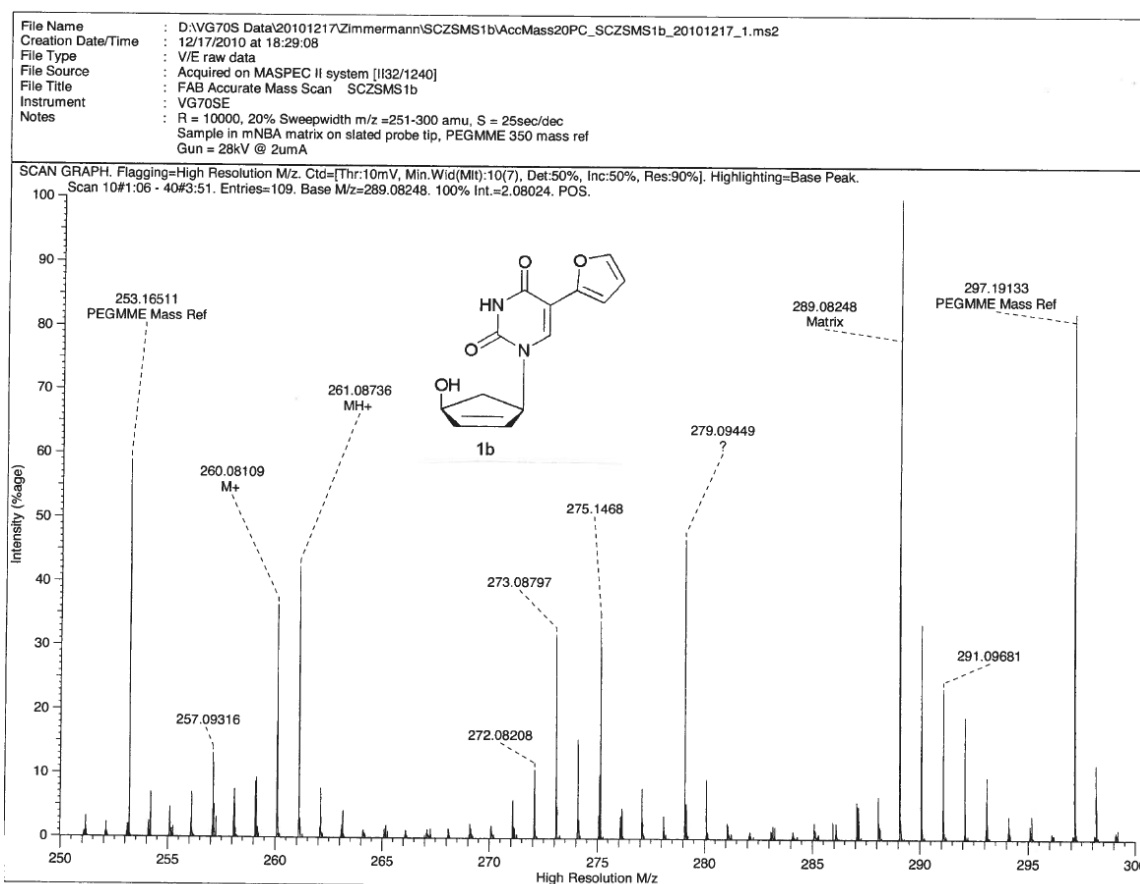

Figure S7. HRMS of 1b



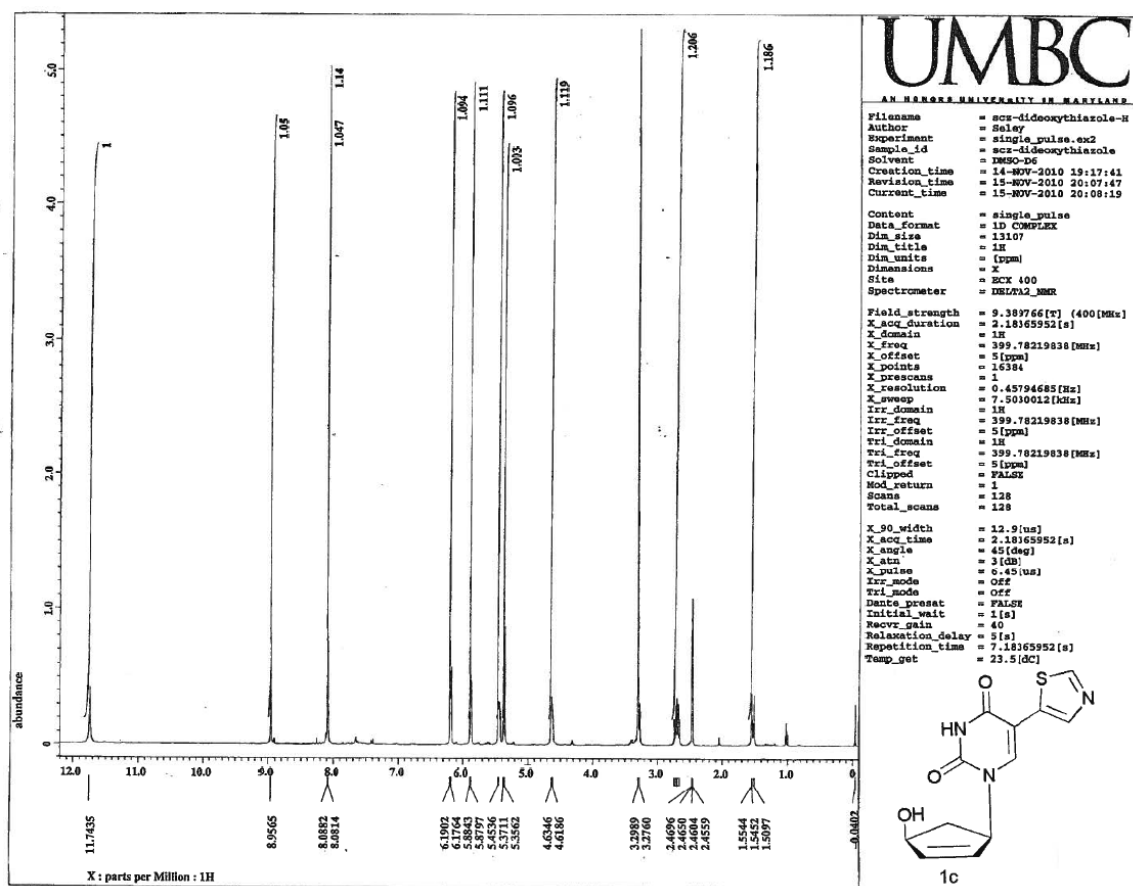

Figure S8. <sup>1</sup>H NMR of 1c

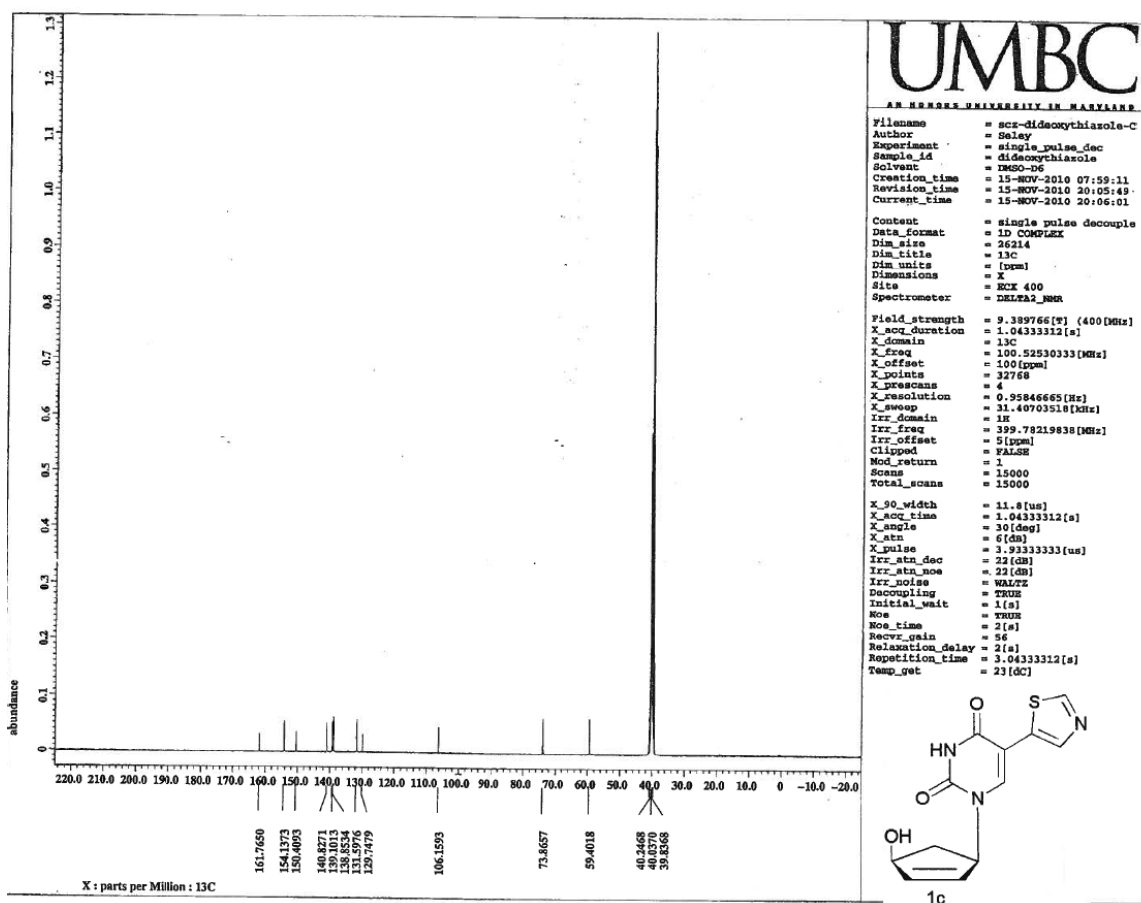

Figure S9.  $^{13}\text{C}$  NMR of 1c

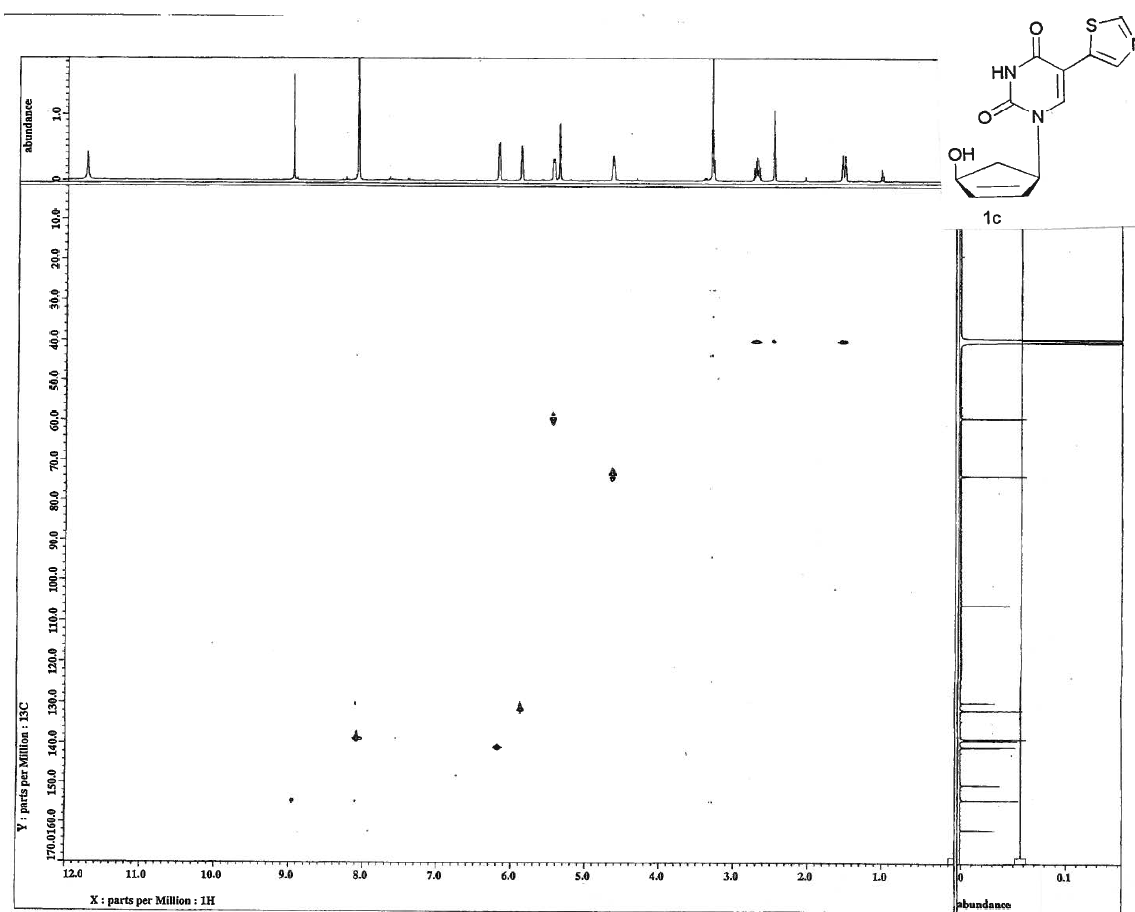

Figure S10. HMQC of 1c

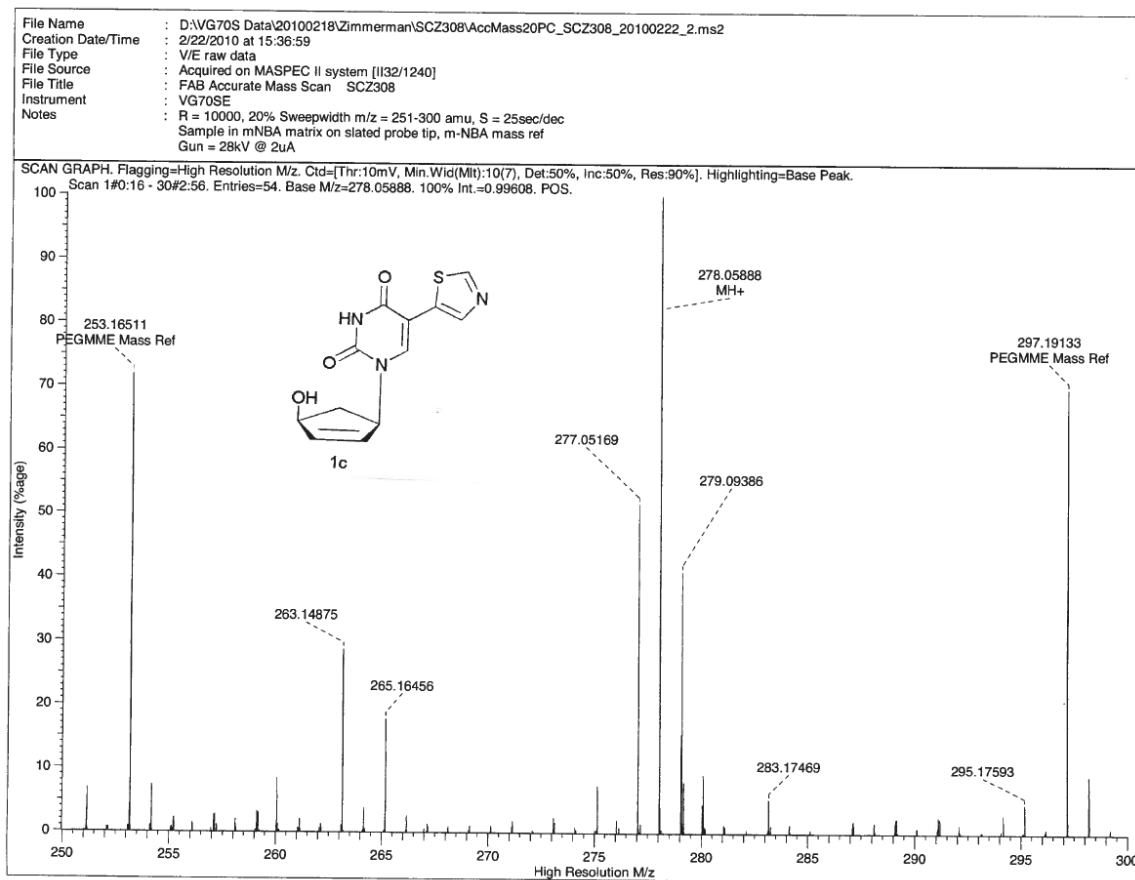

Figure S11. HRMS of 1c
